# Supplementary material for: Screening and prioritization of antibiotics in drinking water source based on risk assessment, a case study in Guangzhou
Source: Research Square preprint supplement (doi:10.21203/rs.3.rs-7201162/v1), 2025-09-03
Supplement: Supplementary file 1 [file a61f2ebafbed72ca8044239e.docx]

**Supplementary material**

**MANUSCRIPT TITLE:** Screening and prioritization of antibiotics in drinking water source based on risk assessment, a case study in Guangzhou

**AUTHORS:** Lulu Zhang, Lingyun Yu, Qianqian Yu, Xuan Yu, Sijia Liu, Zhanlu Lv, Han Zhang, Qiusen Huang, Ling-Chuan Guo, and Jingru Zhang

ADDRESS: Guangdong Provincial Academy of Environmental Sciences, Guangzhou 510045, China, State Key Laboratory of Environmental Criteria and Risk Assessment, State Environmental Protection Key Laboratory of Ecological Effect and Risk Assessment of Chemicals, Chinese Research Academy of Environmental Sciences, Beijing 100012, China, Advanced Interdisciplinary Institute of Environment and Ecology, Beijing Normal University, Zhuhai 519000, China

**TABLES:** 9

**FIGURES:** 0

**NO. OF PAGES:** 17

1. Quality Assurance and Quality Control

In this study, instrumental performance was monitored by analyzing a calibration standard every 10 samples, with variations in individual target analytes remaining within 20%. A method blank (solvent), a matrix blank (Milli-Q water), a matrix spike and its duplicate (Milli-Q water spiked with target antibiotics) were analyzed for every 20 samples. No target analytes were detected above their reporting limits (RLs) in the blanks.

The recoveries (mean ± standard deviation) for matrix spike samples were acceptable for all target antibiotics (65% ± 20%). The recoveries of the surrogate standards were acceptable for sulfamethoxazole-d4 (87% ± 21%), norfloxacin-d5 (58% ± 15%), and roxithromycin-d7 (73% ± 15%).

**Table S1** Longitude, latitude, name, and type of the sample sites

| Site | Longitude | Latitude | Name | Type |
| --- | --- | --- | --- | --- |
| 1 | 113.72496 | 23.72172 | W1 | waterworks |
| 2 | 113.60349 | 23.55835 | W2 | waterworks |
| 3 | 113.55506 | 23.51749 | P1 | pollution sources |
| 4 | 113.52258 | 23.48988 | W3 | waterworks |
| 5 | 113.471007 | 23.434654 | W4 | waterworks |
| 6 | 113.471175 | 23.439584 | W5 | waterworks |
| 7 | 113.467747 | 23.431009 | W6 | waterworks |
| 8 | 113.404032 | 23.398538 | W7 | waterworks |
| 9 | 113.352791 | 23.415541 | W8 | waterworks |
| 10 | 113.340387 | 23.355246 | P2 | pollution sources |
| 11 | 113.299862 | 23.344967 | P3 | pollution sources |
| 12 | 113.296066 | 23.328752 | W9 | waterworks |
| 13 | 113.276622 | 23.304814 | P4 | pollution sources |
| 14 | 113.259952 | 23.293008 | W10 | waterworks |
| 15 | 113.189075 | 23.245673 | P5 | pollution sources |

**Table S2** Physiochemical properties of the antibiotics in this study

| Category | Antibiotic | Abbreviation | CAS number | Chemical formula | Log Kow |
| --- | --- | --- | --- | --- | --- |
| quinolones | pefloxacin | PFX | 70458-92-3 | C17H20FN3O3 | 0.27 |
| ofloxacin | OFL | 82419-36-1 | C18H20FN3O4 | -2.0 |
| enoxacin | ENO | 74011-58-8 | C15H17FN4O3 | -0.20 |
| norfloxacin | NOR | 70458-96-7 | C16H18FN3O3 | -1.0 |
| ciprofloxacin | CIP | 85721-33-1 | C17H18FN3O3 | 0.28 |
| enrofloxacin | ENR | 93106-60-6 | C19H22FN3O3 | 0.70 |
| danofloxacin | DAN | 112398-08-0 | C19H20FN3O3 | 0.44 |
| lomefloxacin | LOM | 98079-51-7 | C17H19F2N3O3 | -0.30 |
| sarafloxacin | SAR | [98105-99-8](https://www.chemsrc.com/baike/946823.html" \o "https://www.chemsrc.com/baike/946823.html) | C20H17F2N3O3 | 1.1 |
| cinoxacin | CIN | 28657-80-9 | C12H10N2O5 | 1.6 |
| oxolinic acid | OXO | 14698-29-4 | C13H11NO5 | 0.94 |
| flumequine | FLU | 42835-25-6 | C14H12FNO3 | 2.6 |
| nalidixic acid | NDA | 389-08-2 | C12H12N2O3 | 1.6 |
| pipemidic acid | PIPA | 51940-44-4 | C14H17N5O3 | -2.2 |
| sulfonamides | sulfacetamide | SCM | 144-80-9 | C8H10N2O3S | -0.96 |
| sulfamethizole | SFT | 144-82-1 | C9H10N4O2S2 | 0.54 |
| sulfisoxazole | SIZ | 127-69-5 | C11H13N3O3S | 1.0 |
| sulfadiazine | SDZ | 68-35-9 | C10H10N4O2S | -0.090 |
| sulfachloropyridazine | SCP | 80-32-0 | C10H9ClN4O2S | 0.31 |
| sulfamethoxazole | SMX | 723-46-6 | C10H11N3O3S | 0.89 |
| sulfathiazole | STZ | 72-14-0 | C9H9N3O2S2 | 0.050 |
| sulfamethoxypyridazine | SMP | 80-35-3 | C11H12N4O3S | 0.32 |
| sulfamerazine | SMR | 127-79-7 | C11H12N4O2S | 0.14 |
| sulfadoxine | SD | 2447-57-6 | C12H14N4O4S | 0.70 |
| sulfapyridine | SPD | 144-83-2 | C11H11N3O2S | 0.35 |
| sulfameter | SM | 651-06-9 | C11H12N4O3S | 0.41 |
| sulfamonomethoxine | SMM | 1220-83-3 | C11H12N4O3S | 0.70 |
| sulfamethazine | SMT | 57-68-1 | C12H14N4O2S | 0.89 |
| sulfaphenazole | SPZ | 526-08-9 | C15H14N4O2S | 1.5 |
| sulfadimethoxine | SDM | 122-11-2 | C12H14N4O4S | 1.6 |
| tetracyclines | minocycline | MINO | 10118-90-8 | C23H27N3O7 | 0.050 |
| oxytetracycline | OTC | 79-57-2 | C22H24N2O9 | -0.90 |
| tetracycline | TC | 60-54-8 | C22H24N2O8 | -1.3 |
| demeclocycline | DMC | 127-33-3 | C21H21ClN2O8 | -1.1 |
| chlortetracycline | CTC | 57-62-5 | C22H23ClN2O8 | -0.62 |
| metacycline | MTC | 914-00-1 | C22H22N2O8 | -1.4 |
| doxycycline | DC | 564-25-0 | C22H24N2O8 | -0.020 |
| anhydrotetracycline | AhTC | 1665-56-1 | C22H22N2O7 | 0.63 |
| macrolides | erythromycin | ETM | 114-07-8 | C37H67NO13 | 3.1 |
| roxithromycin | RXM | 80214-83-1 | C41H76N2O15 | 2.8 |

**Table S3** Lowest PNECs of the antibiotics considered in this study

| Category | Antibiotic | Lowest PNECs (μg/L) |
| --- | --- | --- |
| quinolones | pefloxacin | 2.6 |
| ofloxacin | 1.4 |
| enoxacin | 2.5 |
| norfloxacin | 0.16 |
| ciprofloxacin | 0.089 |
| enrofloxacin | 1.6 |
| danofloxacin | 0.093 |
| lomefloxacin | 0.83 |
| sarafloxacin | 1.9 |
| cinoxacin | 3.7 |
| oxolinic acid | 1.1 |
| flumequine | 1.5 |
| nalidixic acid | 4.7 |
| pipemidic acid | 0.95 |
| sulfonamides | sulfacetamide | 14 |
| sulfamethizole | 1.5 |
| sulfisoxazole | 4.6 |
| sulfadiazine | 1.0 |
| sulfachloropyridazine | 0.73 |
| sulfamethoxazole | 0.60 |
| sulfathiazole | 1.9 |
| sulfamethoxypyridazine | 1.4 |
| sulfamerazine | 0.68 |
| sulfadoxine | 1.5 |
| sulfapyridine | 0.46 |
| sulfameter | 1.0 |
| sulfamonomethoxine | 1.9 |
| sulfamethazine | 30 |
| sulfaphenazole | 0.12 |
| sulfadimethoxine | 1.2 |
| tetracyclines | minocycline | 0.038 |
| oxytetracycline | 0.43 |
| tetracycline | 0.090 |
| demeclocycline | 0.21 |
| chlortetracycline | 0.30 |
| metacycline | NA |
| doxycycline | 0.20 |
| anhydrotetracycline | 0.069 |
| macrolides | erythromycin | 0.30 |
| roxithromycin | 0.083 |

Note: The PNEC values were lowest PNECs obtained from the NORMAN ecotoxicology database (https://www.norman-network.com/nds/ecotox/); NA: not available.

**Table S4** Acceptable daily intake of antibiotics considered in this study

| Category | Antibiotic | Acceptable daily intake (μg/kg·day) |
| --- | --- | --- |
| quinolones | pefloxacin | 160000 |
|  | ofloxacin | 143600 |
|  | enoxacin | 200000 |
|  | norfloxacin | 160000 |
|  | ciprofloxacin | 80000 |
|  | enrofloxacin | 200000 |
|  | danofloxacin | 24000 |
|  | lomefloxacin | 152000 |
|  | sarafloxacin | 320000 |
|  | cinoxacin | 144400 |
|  | oxolinic acid | 21000 |
|  | flumequine | 21000 |
|  | nalidixic acid | 50000 |
|  | pipemidic acid | 640000 |
| Sulfonamides | sulfacetamide | 660000 |
|  | sulfamethizole | 140000 |
|  | sulfisoxazole | 400000 |
|  | sulfadiazine | 60000 |
|  | sulfachloropyridazine | 50000 |
|  | sulfamethoxazole | 248000 |
|  | sulfathiazole | 180000 |
|  | sulfamethoxypyridazine | 109600 |
|  | sulfamerazine | 1000000 |
|  | sulfadoxine | 208000 |
|  | sulfapyridine | 632000 |
|  | sulfameter | 240000 |
|  | sulfamonomethoxine | 400000 |
|  | sulfamethazine | 2000000 |
|  | sulfaphenazole | 120640 |
|  | sulfadimethoxine | 33760 |
| tetracyclines | minocycline | 124000 |
|  | oxytetracycline | 500 |
|  | tetracycline | 28600 |
|  | demeclocycline | 270000 |
|  | chlortetracycline | 55000 |
|  | metacycline | 115194 |
|  | doxycycline | 80000 |
|  | anhydrotetracycline | 1360 |
| macrolides | erythromycin | 150000 |
|  | roxithromycin | 33200 |

Note: The acceptable daily intake values obtained from the Comptox Dashboard (https://comptox.epa.gov/dashboard/chemical/hazard/), Drugfuture database (https://www.drugfuture.com/toxic/), and Pubchem Database (https://pubchem.ncbi.nlm.nih.gov/compound/).

**Table S5** Average body weight and daily water intake for all age groups (de Jesus Gaffney et al. 2015; Feng et al. 2020)

| Age | Body weight (kg) | daily water intake (L/d) |
| --- | --- | --- |
| 0‒3 months | 5.6 | 1.2 |
| 3‒6 months | 7.2 | 1.1 |
| 6‒12 months | 9.4 | 1.2 |
| 1‒2 years | 12 | 0.85 |
| 2‒3 years | 14 | 0.83 |
| 3‒6 years | 19 | 1.2 |
| 6‒11 years | 36 | 1.6 |
| 11‒16 years | 56 | 1.9 |
| 16‒18 years | 57 | 1.8 |
| >18 years | 60 | 2.0 |

**Table S6** key proteins and potential mechanism associated with antibiotic-induced toxic effects

| Protein | Abbreviation | Potential mechanism | Reference |
| --- | --- | --- | --- |
| protein kinase B | AKT1 | Antibiotics interact with key amino acid residues of AKT1, thereby inducing multiple metabolic diseases such as lipid metabolism disorders and atherosclerosis, Alzheimer's disease, and type 2 diabetes mellitus | (Cheng et al. 2025) |
| B-cell lymphoma 2 | BCL2 | Antibiotics interact with key amino acid residues of BCL2, thereby inducing multiple metabolic diseases such as lipid metabolism disorders and atherosclerosis, Alzheimer's disease, and type 2 diabetes mellitus | (Cheng et al. 2025) |
| Signal Transducer and Activator of Transcription 3 | STAT3 | Antibiotics interact with key amino acid residues of STAT3, thereby inducing multiple metabolic diseases such as lipid metabolism disorders and atherosclerosis, Alzheimer's disease, and type 2 diabetes mellitus | (Cheng et al. 2025) |
| Human serum albumin | HSA | The binding of antibiotics induced the unfolding of the polypeptides of HSA and transferred the secondary conformation of HSA | (Chen et al. 2012) |
| Myoglobin | Mb | The binding of antibiotics induced strong conformational changes in the protein structure, resulting in destabilization of the protein structure | (Ovung et al. 2022) |
| Immunoglobulin G | IgG | Antibiotics can bind to IgG and induce conformational changes in the protein | (Wang et al. 2015) |
| carbonic anhydrase I | CA1 | Antibiotics bind to the active site of carbonic anhydrase and exert an inhibitory effect | (Chakravarty and Kannan 1994) |
| Organic anion transporter 4 | OAT4 | Antibiotics can inhibit the substrate uptake mediated by specific SLC transporters | (Lu et al. 2018) |

**Table S7** Details on criteria and attributes used to calculate ToxPi scores of antibiotics

| Criteria | | | Attributes | Unit | Scaling | Weight | Software/Model |
| --- | --- | --- | --- | --- | --- | --- | --- |
| Detected frequency | | | Detected frequency | unitless | x | 1/5 | - |
| Hazard potential | Persistence | | Biowin3 | unitless | -x | 1/15 | BIOWIN v4.11 in EPI Suite v4.1 |
| Bioaccumulation | | BAF | L/kg | log10(x) | 1/15 | BCFBAF v3.02 in EPI Suite v4.1 |
| Toxicity | Ecotoxicological effects | PNECalgae | mg/L | -log10(x) | 1/90 | ECOSARv2.2 |
| PNECdaphnid | mg/L | -log10(x) | 1/90 |
| PNECfish | mg/L | -log10(x) | 1/90 |
| Human health effects | AKT1 | unitless | -x | 1/240 | AutoDockTools-1.5.7 |
| BCL2 | unitless | -x | 1/240 |
| STAT3 | unitless | -x | 1/240 |
| HSA | unitless | -x | 1/240 |
| Mb | unitless | -x | 1/240 |
| IgG | unitless | -x | 1/240 |
| CA1 | unitless | -x | 1/240 |
| OAT4 | unitless | -x | 1/240 |
| Ecological risk | | | RQ | unitless | log10(x) | 1/5 | risk quotient |
| Health risk | | | HQ | unitless | log10(x) | 2/5 | health risk quotient |

**Table S8** Concentration (ng/L) and detection frequencies (DFs) of antibiotic in Liuxi River

| Category | antibiotics | Dry season (ng/L) | | | | | Wet season (ng/L) | | | | |
| --- | --- | --- | --- | --- | --- | --- | --- | --- | --- | --- | --- |
| Max | Median | Mean | Min | DFs (%) | Max | Median | Mean | Min | DFs (%) |
| quinolones | PFX | 0.22 | 0.098 | 0.11 | 0.069 | 100% | - | - | - | - | - |
| OFL | 0.29 | 0.19 | 0.19 | 0.095 | 100% | 10 | 2.8 | 3.3 | 2.5 | 100% |
| ENO | 7.8 | 5.1 | 5.4 | 3.4 | 100% | 0 | 0 | 0 | 0 | 0% |
| NOR | 5.5 | 3.3 | 3.3 | 2.0 | 100% | 6.1 | 0 | 0.98 | 0 | 20% |
| CIP | 7.7 | 4.4 | 4.5 | 2.3 | 100% | 4.9 | 4.8 | 2.8 | 0 | 60% |
| ENR | 2.0 | 1.1 | 1.1 | 0.72 | 100% | 4.4 | 4.2 | 4.0 | 0 | 93% |
| DAN | 2.6 | 2.0 | 1.9 | 1.0 | 100% | 0 | 0 | 0 | 0 | 0% |
| LOM | 0.30 | 0.20 | 0.20 | 0.11 | 100% | 4.6 | 4.6 | 3.0 | 0 | 67% |
| SAR | 2.4 | 1.3 | 1.4 | 0.68 | 100% | 0 | 0 | 0 | 0 | 0% |
| CIN | 2.3 | 1.1 | 1.2 | 0.57 | 100% | 1.9 | 0.91 | 0.87 | 0 | 47% |
| OXO | 0 | 0 | 0 | 0 | 0.0% | 2.5 | 0 | 0.91 | 0 | 40% |
| FLU | 0.060 | 0.025 | 0.031 | 0.025 | 100% | 2.6 | 0 | 0.34 | 0 | 13% |
| NDA | 4.8 | 0.88 | 1.2 | 0.20 | 100% | 2.6 | 0 | 0.27 | 0 | 13% |
| PIPA | 1.7 | 0.97 | 0.93 | 0.37 | 100% | 0 | 0 | 0 | 0 | 0% |
| sulfonamides | SCM | 0.31 | 0.038 | 0.064 | 0.025 | 100% | 0.11 | 0 | 0.0090 | 0 | 13% |
| SFT | 0.025 | 0.025 | 0.025 | 0.025 | 100% | 0 | 0 | 0 | 0 | 0% |
| SIZ | 0.080 | 0.065 | 0.065 | 0.055 | 100% | 0.025 | 0 | 0.0020 | 0 | 6.7% |
| SDZ | 0.78 | 0.12 | 0.19 | 0.025 | 100% | 0.37 | 0.14 | 0.15 | 0 | 93% |
| SCP | 2.7 | 0.025 | 0.21 | 0.025 | 100% | 0.025 | 0.013 | 0.012 | 0 | 47% |
| SMX | 1.6 | 0.71 | 0.69 | 0.025 | 100% | 21 | 5.1 | 6.7 | 0.050 | 100% |
| STZ | 0.070 | 0.050 | 0.042 | 0.025 | 100% | 0.025 | 0 | 0.0030 | 0 | 13% |
| SMP | 0.55 | 0.092 | 0.19 | 0.025 | 100% | 0 | 0 | 0 | 0 | 0% |
| SMR | 0.52 | 0.068 | 0.098 | 0.025 | 100% | 0.03 | 0 | 0.010 | 0 | 40% |
| SD | 0.090 | 0.053 | 0.045 | 0.025 | 100% | 0.03 | 0 | 0.0020 | 0 | 6.7% |
| SPD | 1.3 | 0.28 | 0.33 | 0.025 | 100% | 0.23 | 0.075 | 0.074 | 0 | 93% |
| SM | 0.025 | 0.025 | 0.017 | 0 | 67% | 0.025 | 0 | 0.0070 | 0 | 27% |
| SMM | 0.050 | 0.025 | 0.023 | 0 | 80% | 1.3 | 0.10 | 0.21 | 0.025 | 100% |
| SMT | 1.7 | 0.13 | 0.28 | 0.025 | 100% | 0.20 | 0.085 | 0.095 | 0 | 87% |
| SPZ | 0.34 | 0.19 | 0.20 | 0.10 | 100% | 0.025 | 0 | 0.0050 | 0 | 20% |
| SDM | 0.025 | 0.025 | 0.025 | 0.025 | 100% | 0 | 0 | 0 | 0 | 0% |
| tetracyclines | MINO | 48 | 40 | 38 | 22 | 100% | 2.9 | 0 | 0.75 | 0 | 27% |
| OTC | 140 | 96 | 95 | 70 | 100% | 3.4 | 1.2 | 1.2 | 0 | 47% |
| TC | 6.9 | 4.0 | 4.0 | 2.2 | 100% | 0 | 0 | 0 | 0 | 0% |
| DMC | 8.2 | 4.4 | 4.1 | 1.5 | 100% | 0.88 | 0.72 | 0.63 | 0 | 87% |
| CTC | 4.5 | 2.4 | 2.4 | 1.1 | 100% | 2.3 | 0 | 0.75 | 0 | 33% |
| MTC | 5.9 | 3.2 | 3.3 | 1.4 | 100% | 0 | 0 | 0 | 0 | 0% |
| DC | 9.8 | 8.2 | 7.7 | 4.7 | 100% | 0.61 | 0.54 | 0.40 | 0 | 73% |
| AhTC | 0.57 | 0.30 | 0.34 | 0.16 | 100% | 0 | 0 | 0 | 0 | 0% |
| macrolides | ETM | 0.41 | 0.16 | 0.17 | 0.025 | 100% | 0 | 0 | 0 | 0 | 0% |
| RXM | 3.7 | 0.97 | 1.2 | 0.065 | 100% | 1.3 | 0.47 | 0.38 | 0 | 67% |

**Table S9** Antibiotic concentrations in drinking water source of other regions (ng/L)

| Regions | Detected antibiotics | Concentration | Reference |
| --- | --- | --- | --- |
| Liuxi River, China | 40 antibiotics | dry season:179  wet season:28 | This study |
| Rural Eastern China | 27 antibiotics | n.d.‒8.3 | (Wang et al. 2023) |
| lower Yangtze River, China | 39 antibiotics | spring: 235‒ 6516  fall: 151‒2563 | (Wang et al. 2023) |
| Hainan, China | 50 antibiotics | max:125 | (Huang et al. 2022) |
| East China | 11 antibiotics | 20‒497 | (Hu et al. 2021) |
| North China Plain | 8 antibiotics | average:5.7 | (Shi et al. 2022) |
| drinking water reservoir in Germany | 45 antibiotics | 10‒600 | (Voigt et al. 2020) |
| lower Yangtze River | 5 tetracyclines | 0‒110 | (Wang et al. 2019) |
| Wuhan, China | 15 antibiotics | n.d.‒1708 | (Jiang et al. 2023) |
| piedmont of North Carolina, USA | 15 antibiotics | 0‒1227 | (Gray et al. 2020) |

n.d.: not detected.

**References:**

Chakravarty S, Kannan KK (1994) Drug-Protein Interactions: Refined Structures of Three Sulfonamide Drug Complexes of Human Carbonic Anhydrase I Enzyme. J Mol Biol 243:298-309. https://doi.org/10.1006/jmbi.1994.1655

Chen J, Zhou X, Zhang Y, Gao H (2012) Potential toxicity of sulfanilamide antibiotic: Binding of sulfamethazine to human serum albumin. Sci Total Environ 432:269-274. https://doi.org/10.1016/j.scitotenv.2012.06.003

Cheng M, Li M, Zhang Y, Gu X, Gao W, Zhang S, Liu J (2025) Exploring the mechanism of PPCPs on human metabolic diseases based on network toxicology and molecular docking. Environ Int 196:109324. https://doi.org/10.1016/j.envint.2025.109324

Gray AD, Todd D, Hershey AE (2020) The seasonal distribution and concentration of antibiotics in rural streams and drinking wells in the piedmont of North Carolina. Sci Total Environ 710:136286. https://doi.org/10.1016/j.scitotenv.2019.136286

Hu Y, Jin L, Zhao Y, Jiang L, Yao S, Zhou W, Lin K, Cui C (2021) Annual trends and health risks of antibiotics and antibiotic resistance genes in a drinking water source in East China. Sci Total Environ 791:148152. https://doi.org/10.1016/j.scitotenv.2021.148152

Huang D, Wu Y, Jiang Y, Zhang M, Cheng L, He S, Chen B (2022) Rapid determination, pollution characteristics and risk evaluations of antibiotics in drinking water sources of Hainan, China. Chin J Anal Chem 50:100164. https://doi.org/10.1016/j.cjac.2022.100164

Jiang L, Zhai W, Wang J, Li G, Zhou Z, Li B, Zhuo H (2023) Antibiotics and antibiotic resistance genes in the water sources of the Wuhan stretch of the Yangtze River: Occurrence, distribution, and ecological risks. Environ Res 239:117295. https://doi.org/10.1016/j.envres.2023.117295

Lu X, Chan T, Zhu L, Bao X, Velkov T, Zhou QT, Li J, Chan H, Zhou F (2018) The inhibitory effects of eighteen front-line antibiotics on the substrate uptake mediated by human Organic anion/cation transporters, Organic anion transporting polypeptides and Oligopeptide transporters in in vitro models. Eur J Pharm Sci 115:132-143. https://doi.org/10.1016/j.ejps.2018.01.002

Ovung A, Mavani A, Ghosh A, Chatterjee S, Das A, Suresh Kumar G, Ray D, Aswal VK, Bhattacharyya J (2022) Heme Protein Binding of Sulfonamide Compounds: A Correlation Study by Spectroscopic, Calorimetric, and Computational Methods. Acs Omega 7:4932-4944. 10.1021/acsomega.1c05554

Shi J, Dong Y, Shi Y, Yin T, He W, An T, Tang Y, Hou X, Chong S, Chen D, Qin K, Lin H (2022) Groundwater antibiotics and microplastics in a drinking-water source area, northern China: Occurrence, spatial distribution, risk assessment, and correlation. Environ Res 210:112855. https://doi.org/10.1016/j.envres.2022.112855

Voigt AM, Ciorba P, Döhla M, Exner M, Felder C, Lenz-Plet F, Sib E, Skutlarek D, Schmithausen RM, Faerber HA (2020) The investigation of antibiotic residues, antibiotic resistance genes and antibiotic-resistant organisms in a drinking water reservoir system in Germany. Int J Hyg Environ Health 224:113449. https://doi.org/10.1016/j.ijheh.2020.113449

Wang N, Wang N, Qi D, Kang G, Wang W, Zhang C, Zhang Z, Zhang Y, Zhang H, Zhang S, Xu J (2023) Comprehensive overview of antibiotic distribution, risk and priority: A study of large-scale drinking water sources from the lower Yangtze River. J Environ Manage 344:118705. https://doi.org/10.1016/j.jenvman.2023.118705

Wang Q, Ge H, Liu C, Zhang S, Tian G (2015) Mechanistic and conformational studies on the interaction of sulfamethazine with human immunoglobulin G by molecular modeling and multi-spectroscopic approach in vitro. Luminescence 30:798-804. https://doi.org/10.1002/bio.2822

Wang Y, Dong X, Zang J, Zhao X, Jiang F, Jiang L, Xiong C, Wang N, Fu C (2023) Antibiotic residues of drinking-water and its human exposure risk assessment in rural Eastern China. Water Res 236:119940. https://doi.org/10.1016/j.watres.2023.119940

Wang Z, Chen Q, Zhang J, Dong J, Yan H, Chen C, Feng R (2019) Characterization and source identification of tetracycline antibiotics in the drinking water sources of the lower Yangtze River. J Environ Manage 244:13-22. https://doi.org/10.1016/j.jenvman.2019.04.070
